# Supplementary material for: Transcriptomic Signatures of Neuronally Derived Extracellular Vesicles Reveal the Presence of Olfactory Receptors in Clinical Samples from Traumatic Brain Injury Patients
Source: MDPI journal article supplement (doi:10.3390/ijms25052777), 2024-02-28
Supplement: s1 [file s1]

## Supplementary Figure and Tables.

**Table S1.** Quality control and statistics of reads

| Sample    | Raw Data  |        | Valid Data |        | Valid Ratio(reads) | Q20%  | Q30%  | GC content% |
|-----------|-----------|--------|------------|--------|--------------------|-------|-------|-------------|
|           | Read      | Base   | Read       | Base   |                    |       |       |             |
| Control_1 | 166205838 | 24.93G | 161613252  | 24.24G | 97.24              | 99.39 | 94.44 | 44          |
| Control_2 | 160207896 | 24.03G | 155849662  | 23.38G | 97.28              | 99.44 | 95.11 | 44          |
| Control_3 | 180642412 | 27.10G | 176178340  | 26.43G | 97.53              | 99.51 | 94.69 | 43          |
| Control_4 | 139469322 | 20.92G | 135755164  | 20.36G | 97.34              | 99.48 | 94.73 | 48          |
| Control_5 | 120342794 | 18.05G | 117165130  | 17.57G | 97.36              | 99.42 | 94.73 | 45          |
| Control_6 | 180521446 | 27.08G | 175614722  | 26.34G | 97.28              | 99.23 | 94.19 | 43.5        |
| Control_7 | 204566354 | 30.68G | 199392580  | 29.91G | 97.47              | 99.72 | 96.71 | 44          |
| Control_8 | 139871038 | 20.98G | 135636406  | 20.35G | 96.97              | 99.29 | 95.73 | 44          |
| STBI_1    | 129584956 | 19.44G | 125393230  | 18.81G | 96.77              | 98.64 | 93.22 | 46          |
| STBI_2    | 162814002 | 24.42G | 157451142  | 23.62G | 96.71              | 98.71 | 94.12 | 44          |
| STBI_3    | 140644900 | 21.10G | 136306318  | 20.45G | 96.92              | 98.91 | 94.5  | 45          |
| STBI_4    | 133357446 | 20.00G | 129248800  | 19.39G | 96.92              | 98.68 | 92.97 | 46          |
| STBI_5    | 143871490 | 21.58G | 139460808  | 20.92G | 96.93              | 99.29 | 92.88 | 46          |
| STBI_6    | 158970820 | 23.85G | 154087856  | 23.11G | 96.93              | 99.58 | 95.6  | 45          |
| STBI_7    | 171703474 | 25.76G | 167155746  | 25.07G | 97.35              | 99.69 | 96.19 | 44          |
| STBI_8    | 165042378 | 24.76G | 160028714  | 24.00G | 96.96              | 99.41 | 95.42 | 45          |

Table S2. Mapping to genome

| Sample    | Valid reads | Mapped reads          | Unique Mapped reads   | Multi Mapped reads   | PE Mapped reads       | Reads map to sense strand | Reads map to antisense strand | Non-splice reads      | Splice reads      |
|-----------|-------------|-----------------------|-----------------------|----------------------|-----------------------|---------------------------|-------------------------------|-----------------------|-------------------|
| Control_1 | 147847412   | 126472225<br>(85.54%) | 106937837<br>(72.33%) | 19534388<br>(13.21%) | 89273488<br>(60.38%)  | 61200988<br>(41.39%)      | 61456112<br>(41.57%)          | 122187776<br>(82.64%) | 469324<br>(0.32%) |
| Control_2 | 143211202   | 119068664<br>(83.14%) | 104211954<br>(72.77%) | 14856710<br>(10.37%) | 69905494<br>(48.81%)  | 57539428<br>(40.18%)      | 57872570<br>(40.41%)          | 115048673<br>(80.33%) | 363325<br>(0.25%) |
| Control_3 | 164639384   | 140481847<br>(85.33%) | 121916225<br>(74.05%) | 18565622<br>(11.28%) | 86781274<br>(52.71%)  | 67910291<br>(41.25%)      | 68262013<br>(41.46%)          | 135683880<br>(82.41%) | 488424<br>(0.30%) |
| Control_4 | 114714628   | 73430378<br>(64.01%)  | 64860458<br>(56.54%)  | 8569920<br>(7.47%)   | 41732470<br>(36.38%)  | 35584360<br>(31.02%)      | 35837476<br>(31.24%)          | 71251354<br>(62.11%)  | 170482<br>(0.15%) |
| Control_5 | 105439778   | 79137827<br>(75.06%)  | 69302840<br>(65.73%)  | 9834987<br>(9.33%)   | 45171688<br>(42.84%)  | 38319315<br>(36.34%)      | 38530367<br>(36.54%)          | 76640565<br>(72.69%)  | 209117<br>(0.20%) |
| Control_6 | 162911330   | 140619712<br>(86.32%) | 118568722<br>(72.78%) | 22050990<br>(13.54%) | 104009650<br>(63.84%) | 68214639<br>(41.87%)      | 68456109<br>(42.02%)          | 136226184<br>(83.62%) | 444564<br>(0.27%) |
| Control_7 | 186074406   | 149919288<br>(80.57%) | 132705345<br>(71.32%) | 17213943<br>(9.25%)  | 83815706<br>(45.04%)  | 72393810<br>(38.91%)      | 72793204<br>(39.12%)          | 144655518<br>(77.74%) | 531496<br>(0.29%) |
| Control_8 | 124574732   | 97763810<br>(78.48%)  | 87089264<br>(69.91%)  | 10674546<br>(8.57%)  | 46550652<br>(37.37%)  | 47364384<br>(38.02%)      | 47584418<br>(38.20%)          | 94692359<br>(76.01%)  | 256443<br>(0.21%) |
| STBI_1    | 112572930   | 87622908<br>(77.84%)  | 76827515<br>(68.25%)  | 10795393<br>(9.59%)  | 50472938<br>(44.84%)  | 42517691<br>(37.77%)      | 42686769<br>(37.92%)          | 84957514<br>(75.47%)  | 246946<br>(0.22%) |
| STBI_2    | 143324992   | 118284440<br>(82.53%) | 102781096<br>(71.71%) | 15503344<br>(10.82%) | 77109852<br>(53.80%)  | 57289100<br>(39.97%)      | 57488597<br>(40.11%)          | 114398105<br>(79.82%) | 379592<br>(0.26%) |
| STBI_3    | 123551548   | 94661132<br>(76.62%)  | 82940161<br>(67.13%)  | 11720971<br>(9.49%)  | 53992430<br>(43.70%)  | 45857134<br>(37.12%)      | 46050982<br>(37.27%)          | 91649081<br>(74.18%)  | 259035<br>(0.21%) |
| STBI_4    | 115936838   | 87067991<br>(75.10%)  | 76527126<br>(66.01%)  | 10540865<br>(9.09%)  | 44089936<br>(38.03%)  | 42122735<br>(36.33%)      | 42335156<br>(36.52%)          | 84208703<br>(72.63%)  | 249188<br>(0.21%) |
| STBI_5    | 127168388   | 92212706<br>(72.51%)  | 78935164<br>(62.07%)  | 13277542<br>(10.44%) | 62298968<br>(48.99%)  | 44715510<br>(35.16%)      | 44867075<br>(35.28%)          | 89309476<br>(70.23%)  | 273109<br>(0.21%) |
| STBI_6    | 139951168   | 107077413<br>(76.51%) | 92033726<br>(65.76%)  | 15043687<br>(10.75%) | 77320902<br>(55.25%)  | 51899977<br>(37.08%)      | 52070288<br>(37.21%)          | 103670611<br>(74.08%) | 299654<br>(0.21%) |
| STBI_7    | 156213084   | 135642998<br>(86.83%) | 115909870<br>(74.20%) | 19733128<br>(12.63%) | 95964978<br>(61.43%)  | 65499761<br>(41.93%)      | 65733128<br>(42.08%)          | 130682440<br>(83.66%) | 550449<br>(0.35%) |
| STBI_8    | 145032926   | 121182442<br>(83.56%) | 103755733<br>(71.54%) | 17426709<br>(12.02%) | 83483852<br>(57.56%)  | 58771381<br>(40.52%)      | 58962226<br>(40.65%)          | 117374117<br>(80.93%) | 359490<br>(0.25%) |

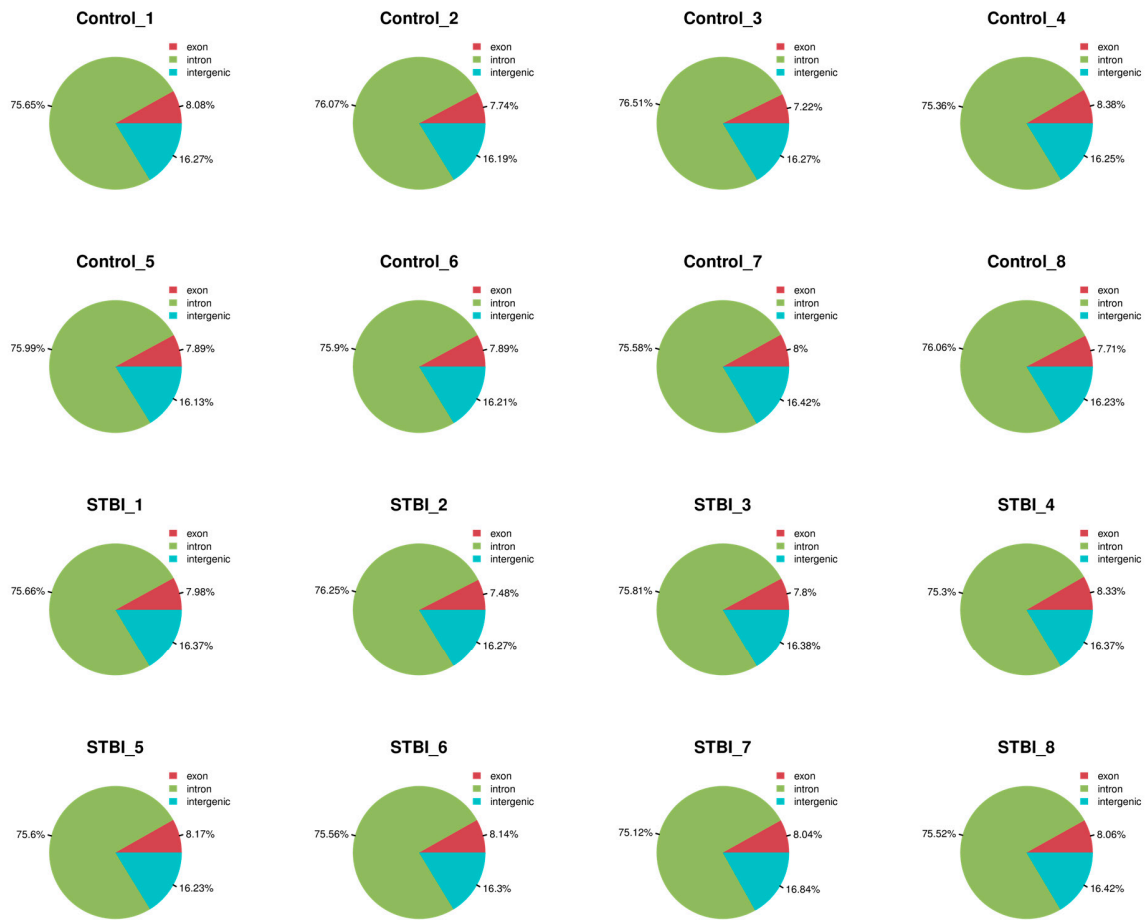

**Figure S1.** Statistics of mapped reads to genome

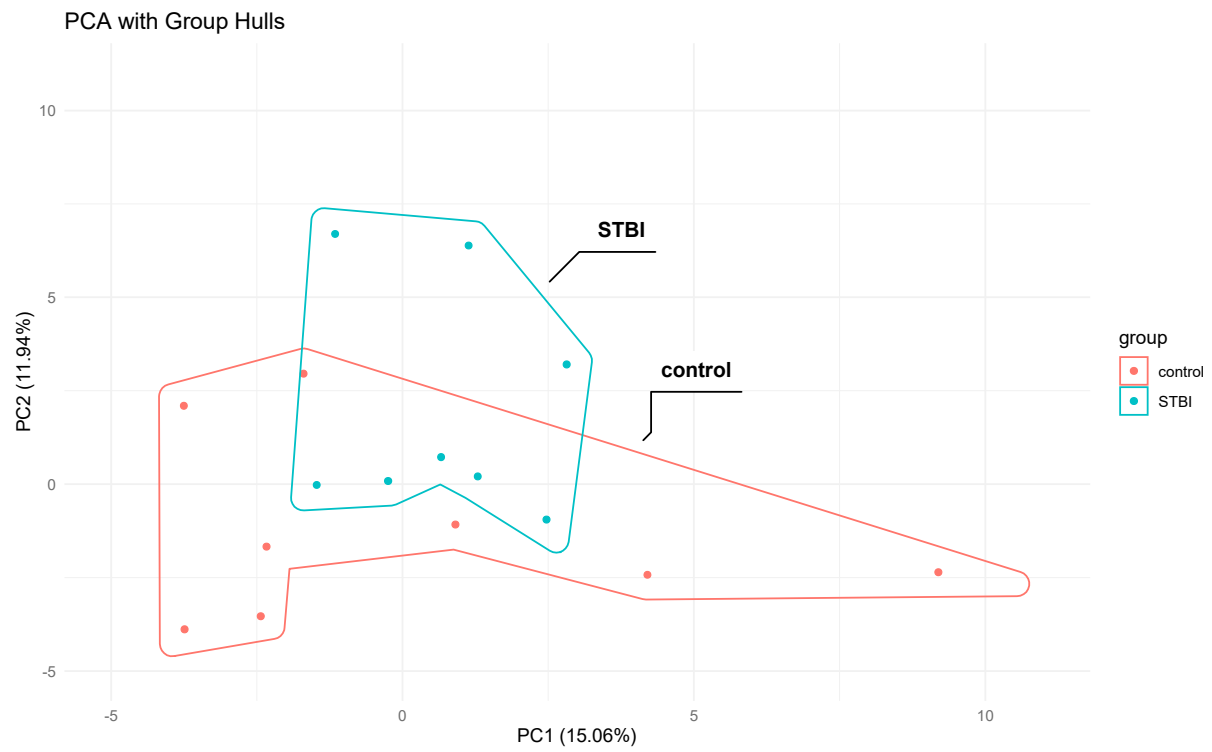

**Figure S2: Principal Component Analysis (PCA) for the controls and TBI groups using Hulls plot.**

**Table S3.** Statistics of sample gene expression

| Sample    | Exp gene | Min. | 1st Qu. | Median | Mean | 3rd Qu. | Max.   | Sd.  | Sum.    |
|-----------|----------|------|---------|--------|------|---------|--------|------|---------|
| Control_1 | 995887   | 0    | 0.65    | 1.18   | 1.36 | 1.85    | 373.03 | 1.2  | 1356206 |
| Control_2 | 1001940  | 0    | 0.7     | 1.21   | 1.38 | 1.85    | 305.94 | 1.16 | 1378003 |
| Control_3 | 1011889  | 0    | 0.85    | 1.28   | 1.37 | 1.76    | 283.23 | 0.98 | 1383409 |
| Control_4 | 447534   | 0    | 1.15    | 3.05   | 4.17 | 5.99    | 169.27 | 4.04 | 1868169 |
| Control_5 | 580188   | 0    | 0.81    | 2.12   | 3.18 | 4.91    | 181.85 | 3.19 | 1843490 |
| Control_6 | 1006817  | 0    | 0.73    | 1.21   | 1.35 | 1.8     | 240.03 | 1.02 | 1355063 |
| Control_7 | 1009884  | 0    | 0.81    | 1.26   | 1.35 | 1.76    | 366.98 | 1.05 | 1358756 |
| Control_8 | 709195   | 0    | 0.64    | 1.49   | 2.34 | 3.02    | 180.33 | 2.61 | 1661434 |
| STBI_1    | 556549   | 0    | 0.52    | 2.22   | 3.39 | 5.26    | 177.24 | 3.67 | 1886389 |
| STBI_2    | 860797   | 0    | 0.55    | 1.24   | 1.66 | 2.27    | 239.76 | 1.69 | 1424827 |
| STBI_3    | 746105   | 0    | 0.58    | 1.39   | 2.06 | 2.68    | 228.53 | 2.33 | 1533325 |
| STBI_4    | 609499   | 0    | 0.49    | 1.92   | 3    | 4.7     | 163.89 | 3.25 | 1828879 |
| STBI_5    | 378701   | 0    | 0.8     | 4.04   | 5.39 | 7.88    | 155.01 | 5.82 | 2042238 |
| STBI_6    | 436535   | 0    | 1.26    | 3.7    | 4.58 | 6.49    | 158.09 | 4.35 | 1999452 |
| STBI_7    | 1005430  | 0    | 0.76    | 1.23   | 1.33 | 1.77    | 271.22 | 1.12 | 1342193 |
| STBI_8    | 522885   | 0    | 0.82    | 2.52   | 3.6  | 5.41    | 167.54 | 3.65 | 1883612 |

**Table S4.** FPMK interval of gene expression

| Sample    | 0-0.1 FI      | 0.1-0.3 FI   | 0.3-3.57 FI    | 3.57-15 FI     | 15-60 FI     | >60 FI    |
|-----------|---------------|--------------|----------------|----------------|--------------|-----------|
| Control_1 | 23883(2.40%)  | 71676(7.20%) | 872069(87.57%) | 28152(2.83%)   | 90(0.01%)    | 17(0.00%) |
| Control_2 | 18878(1.88%)  | 64143(6.40%) | 892532(89.08%) | 26268(2.62%)   | 101(0.01%)   | 18(0.00%) |
| Control_3 | 6886(0.68%)   | 32202(3.18%) | 963900(95.26%) | 8778(0.87%)    | 104(0.01%)   | 19(0.00%) |
| Control_4 | 21606(4.83%)  | 29068(6.50%) | 196299(43.86%) | 190662(42.60%) | 9886(2.21%)  | 13(0.00%) |
| Control_5 | 25643(4.42%)  | 42256(7.28%) | 317324(54.69%) | 191433(32.99%) | 3519(0.61%)  | 13(0.00%) |
| Control_6 | 15108(1.50%)  | 55040(5.47%) | 919399(91.32%) | 17176(1.71%)   | 76(0.01%)    | 18(0.00%) |
| Control_7 | 9082(0.90%)   | 38964(3.86%) | 953613(94.43%) | 8078(0.80%)    | 127(0.01%)   | 20(0.00%) |
| Control_8 | 34425(4.85%)  | 62184(8.77%) | 471071(66.42%) | 140309(19.78%) | 1188(0.17%)  | 18(0.00%) |
| STBI_1    | 63914(11.48%) | 47793(8.59%) | 240974(43.30%) | 196773(35.36%) | 7083(1.27%)  | 12(0.00%) |
| STBI_2    | 48487(5.63%)  | 83417(9.69%) | 642916(74.69%) | 85753(9.96%)   | 206(0.02%)   | 18(0.00%) |
| STBI_3    | 41430(5.55%)  | 72025(9.65%) | 513851(68.87%) | 117862(15.80%) | 921(0.12%)   | 16(0.00%) |
| STBI_4    | 69500(11.40%) | 55844(9.16%) | 288559(47.34%) | 191752(31.46%) | 3833(0.63%)  | 11(0.00%) |
| STBI_5    | 43216(11.41%) | 28133(7.43%) | 106733(28.18%) | 176627(46.64%) | 23956(6.33%) | 36(0.01%) |
| STBI_6    | 33435(7.66%)  | 24420(5.59%) | 155533(35.63%) | 210044(48.12%) | 13091(3.00%) | 12(0.00%) |
| STBI_7    | 12031(1.20%)  | 47857(4.76%) | 934424(92.94%) | 10988(1.09%)   | 106(0.01%)   | 24(0.00%) |
| STBI_8    | 42624(8.15%)  | 35747(6.84%) | 240044(45.91%) | 197553(37.78%) | 6906(1.32%)  | 11(0.00%) |

Table S5. Gene Ontology Analysis for the differentially expressed genes.

| GO Term                                                                | GO function        | Genes                                                                                                        | p-value |
|------------------------------------------------------------------------|--------------------|--------------------------------------------------------------------------------------------------------------|---------|
| G-protein coupled receptor activity                                    | molecular function | CXCR6;NPBWR2;NPY4R;OR10A6;OR14A2;OR6F1;OR1B1;OR1L1;OR2A4;OR4C13;OR4D1;OR4K13;OR51B2;OR52A5;OR5H2;SFRP2;TAAR6 | 0       |
| olfactory receptor activity                                            | molecular function | OR10A6;OR14A2;OR6F1;OR1B1;OR1L1;OR2A4;OR4C13;OR4D1;OR4K13;OR51B2;OR52A5;OR5H2                                | 0       |
| detection of chemical stimulus involved in sensory perception of smell | biological process | OR10A6;OR14A2;OR6F1;OR1B1;OR1L1;OR2A4;OR4C13;OR4D1;OR4K13;OR51B2;OR52A5;OR5H2                                | 0       |
| sensory perception of smell                                            | biological process | OR10A6;OR14A2;OR6F1;OR1B1;OR1L1;OR2A4;OR4C13;OR4D1;OR4K13;OR51B2;OR52A5;OR5H2                                | 0       |
| G-protein coupled receptor signaling pathway                           | biological process | CXCR6;NPBWR2;NPY4R;OR10A6;OR14A2;OR6F1;OR1B1;OR1L1;OR2A4;OR4C13;OR4D1;OR4K13;OR51B2;OR52A5;OR5H2;SFRP2;TAAR6 | 0       |
| detection of chemical stimulus involved in sensory perception          | biological process | OR1B1;OR2A4;OR4C13;OR4D1;OR4K13                                                                              | 0       |
| signal transducer activity                                             | molecular function | CXCR6;NPBWR2;NPY4R;OR10A6;OR14A2;OR6F1;OR1B1;OR1L1;OR2A4;OR4C13;OR4D1;OR4K13;OR51B2;OR52A5;OR5H2;TAAR6       | 0       |
| response to stimulus                                                   | biological process | OR10A6;OR14A2;OR6F1;OR1B1;OR1L1;OR2A4;OR4C13;OR4D1;OR4K13;OR51B2;OR52A5;OR5H2                                | 0       |
| elongin complex                                                        | cellular component | ELOA3D;ELOA3                                                                                                 | 0       |
| transmembrane signaling receptor activity                              | molecular function | KLRF1;OR1B1;OR2A4;OR4C13;OR4D1;OR4K13                                                                        | 0       |

|                                                                                        |                    |                                                  |   |
|----------------------------------------------------------------------------------------|--------------------|--------------------------------------------------|---|
| intermediate filament                                                                  | cellular component | KRTAP10-12;KRTAP15-1;KRTAP19-5;KRTAP2-4;KRTAP7-1 | 0 |
| negative regulation of intrinsic apoptotic signaling pathway in response to DNA damage | biological process | SFRP2;SNAI1                                      | 0 |
| nuclear exosome (RNase complex)                                                        | cellular component | EXOSC1                                           | 0 |
| cytosolic large ribosomal subunit                                                      | cellular component | RPL10L;RPL23A;RPL23                              | 0 |
| translocation of peptides or proteins into host cell cytoplasm                         | biological process | TCP1                                             | 0 |
| regulation of macrophage apoptotic process                                             | biological process | TCP1                                             | 0 |
| Bcl3-Bcl10 complex                                                                     | cellular component | BCL3                                             | 0 |
| ventral spinal cord interneuron fate determination                                     | biological process | NKX2-2                                           | 0 |
| aspartyl-tRNA aminoacylation                                                           | biological process | DARS                                             | 0 |
| cellular response to growth hormone stimulus                                           | biological process | STAR                                             | 0 |
| negative regulation of cell differentiation involved in embryonic placenta development | biological process | SNAI1                                            | 0 |



|                                                                               |                    |               |      |
|-------------------------------------------------------------------------------|--------------------|---------------|------|
| negative regulation of dermatome development                                  | biological process | SFRP2         | 0    |
| type B pancreatic cell fate commitment                                        | biological process | NKX2-2        | 0    |
| thyroxine 5-deiodinase activity                                               | molecular function | DIO3          | 0    |
| positive regulation by host of symbiont catalytic activity                    | biological process | SUGT1         | 0    |
| tRNA catabolic process                                                        | biological process | POP1          | 0    |
| UDP-glucose 6-dehydrogenase activity                                          | molecular function | UGDH          | 0    |
| large ribosomal subunit rRNA binding                                          | molecular function | RPL23         | 0    |
| nuclear heterochromatin                                                       | cellular component | HIST1H1E;TCP1 | 0.01 |
| ribosomal large subunit assembly                                              | biological process | RPL10L;RPL23A | 0.01 |
| insecticide metabolic process                                                 | biological process | STAR          | 0.01 |
| immunoglobulin production involved in immunoglobulin mediated immune response | biological process | GAPT          | 0.01 |

|                                                                                 |                    |        |      |
|---------------------------------------------------------------------------------|--------------------|--------|------|
| positive regulation of interleukin-10 biosynthetic process                      | biological process | BCL3   | 0.01 |
| ribonuclease MRP activity                                                       | molecular function | POP1   | 0.01 |
| regulation of midbrain dopaminergic neuron differentiation                      | NA                 | SFRP2  | 0.01 |
| pancreatic PP cell fate commitment                                              | biological process | NKX2-2 | 0.01 |
| negative regulation of planar cell polarity pathway involved in axis elongation | biological process | SFRP2  | 0.01 |
| Bcl3/NF-kappaB2 complex                                                         | cellular component | BCL3   | 0.01 |
| aspartate-tRNA ligase activity                                                  | molecular function | DARS   | 0.01 |
| pancreatic A cell fate commitment                                               | biological process | NKX2-2 | 0.01 |
| transcription factor activity, RNA polymerase III transcription factor binding  | molecular function | BRF2   | 0.01 |
| thyroid hormone catabolic process                                               | biological process | DIO3   | 0.01 |
| follicular dendritic cell differentiation                                       | biological process | BCL3   | 0.01 |

|                                                                                     |                    |                                                                                                                    |      |
|-------------------------------------------------------------------------------------|--------------------|--------------------------------------------------------------------------------------------------------------------|------|
| positive regulation of Fc-gamma receptor signaling pathway involved in phagocytosis | NA                 | RAP1A                                                                                                              | 0.01 |
| cysteine-type endopeptidase activity involved in apoptotic signaling pathway        | molecular function | CASP10                                                                                                             | 0.01 |
| 3-oxoacid CoA-transferase activity                                                  | molecular function | OXCT2                                                                                                              | 0.01 |
| CoA-transferase activity                                                            | molecular function | OXCT2                                                                                                              | 0.01 |
| protein-DNA complex disassembly                                                     | biological process | RPL23                                                                                                              | 0.01 |
| nucleosome                                                                          | cellular component | HIST1H1E;HIST1H2AK;HIST1H3E                                                                                        | 0.01 |
| glycosaminoglycan metabolic process                                                 | biological process | B3GAT2;NDST1                                                                                                       | 0.01 |
| signal transduction                                                                 | biological process | CXCR6;GNRH2;NPBWR2;NPY4R;OR10A6;OR14A2;OR6F1;OR1B1;OR1L1;OR2A4;OR4C13;OR4D1;OR4K13;OR51B2;OR52A5;OR5H2;RAP1A;TAAR6 | 0.01 |
| nuclear nucleosome                                                                  | cellular component | HIST1H1E;HIST1H3E                                                                                                  | 0.01 |
| keratinization                                                                      | biological process | KRTAP10-12;KRTAP15-1;KRTAP19-5;KRTAP2-4                                                                            | 0.01 |
| thyroxine 5'-deiodinase activity                                                    | molecular function | DIO3                                                                                                               | 0.01 |

|                                                                            |                    |             |      |
|----------------------------------------------------------------------------|--------------------|-------------|------|
| positive regulation of bile acid biosynthetic process                      | biological process | STAR        | 0.01 |
| UDP-glucose metabolic process                                              | biological process | UGDH        | 0.01 |
| meiotic DNA integrity checkpoint                                           | biological process | HUS1B       | 0.01 |
| cellular response to actinomycin D                                         | biological process | RPL23       | 0.01 |
| galactosylgalactosylxylosylprotein 3-beta-glucuronosyltransferase activity | molecular function | B3GAT2      | 0.01 |
| phenol-containing compound metabolic process                               | biological process | STAR        | 0.01 |
| development of primary male sexual characteristics                         | biological process | SFRP2       | 0.01 |
| phthalate metabolic process                                                | biological process | STAR        | 0.01 |
| biphenyl metabolic process                                                 | biological process | STAR        | 0.01 |
| XPC complex                                                                | cellular component | RAD23B      | 0.01 |
| negative regulation of transport                                           | biological process | DDI2;RSC1A1 | 0.01 |

|                                             |                       |       |      |
|---------------------------------------------|-----------------------|-------|------|
| N-acetylglucosamine<br>deacetylase activity | molecular<br>function | NDST1 | 0.01 |
|---------------------------------------------|-----------------------|-------|------|

|                                                         |                    |      |      |
|---------------------------------------------------------|--------------------|------|------|
| cellular response to<br>luteinizing hormone<br>stimulus | biological process | STAR | 0.01 |
|---------------------------------------------------------|--------------------|------|------|

|                                            |                    |         |      |
|--------------------------------------------|--------------------|---------|------|
| positive regulation of<br>bone development | biological process | TMEM119 | 0.01 |
|--------------------------------------------|--------------------|---------|------|

|                                                                       |                    |      |      |
|-----------------------------------------------------------------------|--------------------|------|------|
| DNA-templated<br>transcriptional<br>preinitiation complex<br>assembly | biological process | BRF2 | 0.01 |
|-----------------------------------------------------------------------|--------------------|------|------|

|                                                      |                    |       |      |
|------------------------------------------------------|--------------------|-------|------|
| regulation of<br>establishment of<br>planar polarity | biological process | SFRP2 | 0.01 |
|------------------------------------------------------|--------------------|-------|------|

|                            |                       |       |      |
|----------------------------|-----------------------|-------|------|
| C-X-C chemokine<br>binding | molecular<br>function | CXCR6 | 0.01 |
|----------------------------|-----------------------|-------|------|

|                                                           |                    |        |      |
|-----------------------------------------------------------|--------------------|--------|------|
| spinal cord<br>oligodendrocyte cell<br>fate specification | biological process | NKX2-2 | 0.01 |
|-----------------------------------------------------------|--------------------|--------|------|

|                                         |                    |      |      |
|-----------------------------------------|--------------------|------|------|
| UDP-glucuronate<br>biosynthetic process | biological process | UGDH | 0.01 |
|-----------------------------------------|--------------------|------|------|

|                                  |                       |       |      |
|----------------------------------|-----------------------|-------|------|
| MHC class I receptor<br>activity | molecular<br>function | KLRF1 | 0.01 |
|----------------------------------|-----------------------|-------|------|

|                                          |                    |      |      |
|------------------------------------------|--------------------|------|------|
| circadian sleep/wake<br>cycle, REM sleep | biological process | STAR | 0.01 |
|------------------------------------------|--------------------|------|------|

|                                                        |                    |        |      |
|--------------------------------------------------------|--------------------|--------|------|
| spinal cord<br>oligodendrocyte cell<br>differentiation | biological process | NKX2-2 | 0.01 |
|--------------------------------------------------------|--------------------|--------|------|

|                                                                     |                    |                    |      |
|---------------------------------------------------------------------|--------------------|--------------------|------|
| glycosaminoglycan biosynthetic process                              | biological process | NDST1;UGDH         | 0.02 |
| rRNA binding                                                        | molecular function | RPL23A;SBDS        | 0.02 |
| nucleotide-excision repair                                          | biological process | HUS1B;RAD23B       | 0.02 |
| nuclear-transcribed mRNA catabolic process, nonsense-mediated decay | biological process | PNRC1;RPL23A;RPL23 | 0.02 |
| scaRNA localization to Cajal body                                   | NA                 | TCP1               | 0.02 |
| dibenzo-p-dioxin metabolic process                                  | biological process | STAR               | 0.02 |
| T-helper 2 cell differentiation                                     | biological process | BCL3               | 0.02 |
| ketone body catabolic process                                       | biological process | OXCT2              | 0.02 |
| negative regulation of vitamin D biosynthetic process               | biological process | SNAI1              | 0.02 |
| extracellular matrix protein binding                                | molecular function | CLEC14A            | 0.02 |
| polysaccharide biosynthetic process                                 | biological process | NDST1              | 0.02 |

|                                                           |                    |          |      |
|-----------------------------------------------------------|--------------------|----------|------|
| sclerotome development                                    | biological process | SFRP2    | 0.02 |
| Wnt signaling pathway involved in somitogenesis           | biological process | SFRP2    | 0.02 |
| response to stilbenoid                                    | biological process | LY6D     | 0.02 |
| dATP binding                                              | molecular function | HIST1H1E | 0.02 |
| negative regulation of synaptic vesicle exocytosis        | biological process | RAP1A    | 0.02 |
| regulation of NF-kappaB import into nucleus               | biological process | BCL3     | 0.02 |
| negative regulation of interleukin-8 biosynthetic process | biological process | BCL3     | 0.02 |
| RNA polymerase III type 3 promoter DNA binding            | molecular function | BRF2     | 0.02 |
| regulation of cell junction assembly                      | biological process | RAP1A    | 0.02 |
| death effector domain binding                             | molecular function | CASP10   | 0.02 |
| negative regulation of mesodermal cell fate specification | biological process | SFRP2    | 0.02 |

|                                                                |                    |      |      |
|----------------------------------------------------------------|--------------------|------|------|
| humoral immune response mediated by circulating immunoglobulin | biological process | BCL3 | 0.02 |
|----------------------------------------------------------------|--------------------|------|------|

Table S6. KEGG pathway analysis for the differentially expressed genes.

| KEGG Pathway ID | Pathway                                                    | Genes                                                                         | p-value |
|-----------------|------------------------------------------------------------|-------------------------------------------------------------------------------|---------|
| ko04740         | Olfactory transduction                                     | OR10A6;OR14A2;OR6F1;OR1B1;OR1L1;OR2A4;OR4C13;OR4D1;OR4K13;OR51B2;OR52A5;OR5H2 | 0       |
| ko04972         | Pancreatic secretion                                       | AC040162.1;CTRL;PSMB10;CPA1;RAP1A                                             | 0.02    |
| ko03010         | Ribosome                                                   | RPL10L;RPL23A;RPL23                                                           | 0.05    |
| ko00072         | Synthesis and degradation of ketone bodies                 | OXCT2                                                                         | 0.06    |
| ko04622         | RIG-I-like receptor signaling pathway                      | CASP10;IFNA8                                                                  | 0.07    |
| ko03008         | Ribosome biogenesis in eukaryotes                          | POP1;SBDS                                                                     | 0.09    |
| ko04974         | Protein digestion and absorption                           | AC040162.1;CTRL;PSMB10;CPA1                                                   | 0.11    |
| ko00770         | Pantothenate and CoA biosynthesis                          | PANK3;SLC2A3P1                                                                | 0.11    |
| ko00053         | Ascorbate and aldarate metabolism                          | UGDH                                                                          | 0.11    |
| ko00515         | Mannose type O-glycan biosynthesis                         | B3GAT2                                                                        | 0.14    |
| ko00534         | Glycosaminoglycan biosynthesis - heparan sulfate / heparin | NDST1                                                                         | 0.15    |
| ko04950         | Maturity onset diabetes of the young                       | NKX2-2                                                                        | 0.15    |
| ko00040         | Pentose and glucuronate interconversions                   | UGDH                                                                          | 0.15    |
| ko04668         | TNF signaling pathway                                      | BCL3;CASP10                                                                   | 0.15    |
| ko00650         | Butanoate metabolism                                       | OXCT2                                                                         | 0.16    |
| ko05322         | Systemic lupus erythematosus                               | HIST1H2AK;HIST1H3E                                                            | 0.18    |
| ko05161         | Hepatitis B                                                | CASP10;IFNA8                                                                  | 0.23    |
| ko00970         | Aminoacyl-tRNA biosynthesis                                | DARS                                                                          | 0.25    |
| ko03420         | Nucleotide excision repair                                 | RAD23B                                                                        | 0.25    |



|         |                                             |                        |      |
|---------|---------------------------------------------|------------------------|------|
| ko03050 | Proteasome                                  | AC040162.1;CTRL;PSMB10 | 0.25 |
| ko00520 | Amino sugar and nucleotide sugar metabolism | UGDH                   | 0.26 |
| ko00280 | Valine, leucine and isoleucine degradation  | OXCT2                  | 0.26 |
| ko05320 | Autoimmune thyroid disease                  | IFNA8                  | 0.26 |
| ko04217 | Necroptosis                                 | HIST1H2AK;IFNA8        | 0.27 |
| ko04979 | Cholesterol metabolism                      | STAR                   | 0.27 |
| ko04913 | Ovarian Steroidogenesis                     | STAR                   | 0.27 |
| ko04621 | NOD-like receptor signaling pathway         | IFNA8;SUGT1            | 0.28 |
| ko05034 | Alcoholism                                  | HIST1H2AK;HIST1H3E     | 0.3  |
| ko04080 | Neuroactive ligand-receptor interaction     | NPBWR2;NPY4R;TAAR6     | 0.3  |
| ko05152 | Tuberculosis                                | CASP10;IFNA8           | 0.3  |
| ko05202 | Transcriptional misregulation in cancers    | HIST1H3E;REL           | 0.32 |
| ko04062 | Chemokine signaling pathway                 | CXCR6;RAP1A            | 0.32 |
| ko04623 | Cytosolic DNA-sensing pathway               | IFNA8                  | 0.33 |
| ko04927 | Cortisol synthesis and secretion            | STAR                   | 0.33 |
| ko04720 | Long-term potentiation                      | RAP1A                  | 0.35 |
| ko05211 | Renal cell carcinoma                        | RAP1A                  | 0.35 |
| ko04520 | Adherens junction                           | SNAI1                  | 0.37 |
| ko03018 | RNA degradation                             | EXOSC1                 | 0.4  |
| ko04014 | Ras signaling pathway                       | RAP1A;REL              | 0.43 |
| ko04912 | GnRH signaling pathway                      | GNRH2                  | 0.44 |
| ko04925 | Aldosterone synthesis and secretion         | STAR                   | 0.46 |
| ko04620 | Toll-like receptor signaling pathway        | IFNA8                  | 0.48 |
| ko04060 | Cytokine-cytokine receptor interaction      | CXCR6;IFNA8            | 0.51 |

|         |                                                   |        |      |
|---------|---------------------------------------------------|--------|------|
| ko04670 | Leukocyte transendothelial migration              | RAP1A  | 0.51 |
| ko04919 | Thyroid hormone signaling pathway                 | DIO3   | 0.53 |
| ko04722 | Neurotrophin signaling pathway                    | RAP1A  | 0.53 |
| ko04611 | Platelet activation                               | RAP1A  | 0.54 |
| ko04650 | Natural killer cell mediated cytotoxicity         | IFNA8  | 0.55 |
| ko05160 | Hepatitis C                                       | IFNA8  | 0.57 |
| ko05162 | Measles                                           | IFNA8  | 0.58 |
| ko04210 | Apoptosis                                         | CASP10 | 0.59 |
| ko04310 | Wnt signaling pathway                             | SFRP2  | 0.6  |
| ko04630 | Jak-STAT signaling pathway                        | IFNA8  | 0.65 |
| ko04141 | Protein processing in endoplasmic reticulum       | RAD23B | 0.66 |
| ko05164 | Influenza A                                       | IFNA8  | 0.66 |
| ko04530 | Tight junction                                    | RAP1A  | 0.66 |
| ko03013 | RNA transport                                     | POP1   | 0.67 |
| ko05168 | Herpes simplex infection                          | IFNA8  | 0.69 |
| ko05167 | Kaposi's sarcoma-associated herpesvirus infection | IFNA8  | 0.7  |
| ko04024 | cAMP signaling pathway                            | RAP1A  | 0.72 |
| ko05203 | Viral carcinogenesis                              | REL    | 0.72 |
| ko04510 | Focal adhesion                                    | RAP1A  | 0.72 |
| ko04015 | Rap1 signaling pathway                            | RAP1A  | 0.74 |
| ko04010 | MAPK signaling pathway                            | RAP1A  | 0.85 |
| ko05165 | Human papillomavirus infection                    | IFNA8  | 0.87 |
| ko04151 | PI3K-Akt signaling pathway                        | IFNA8  | 0.89 |
| ko05200 | Pathways in cancer                                | IFNA8  | 0.97 |
